# Supplementary material for: Non-Nutritive Sweeteners Acesulfame Potassium and Sucralose Are Competitive Inhibitors of the Human P-glycoprotein/Multidrug Resistance Protein 1 (PGP/MDR1)
Source: MDPI journal article supplement (doi:10.3390/nu15051118), 2023-02-23
Supplement: s1 [file s1]

Supplementary Material

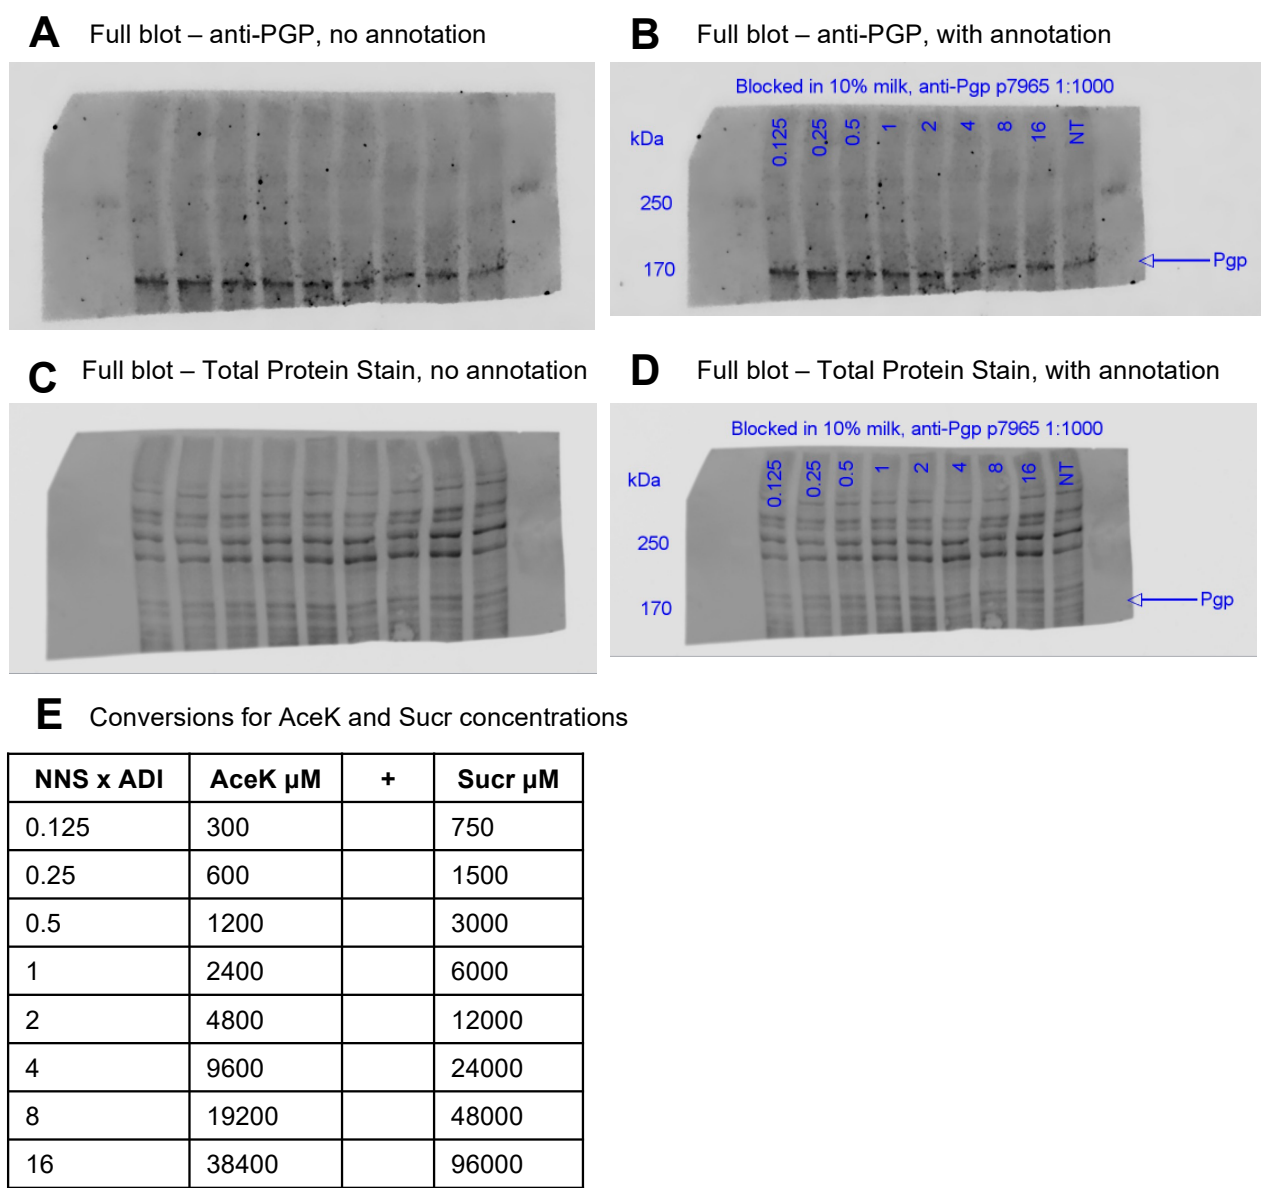

**Figure S1.** Combined AceK + Sucr treatment increases PGP exposure in HepG2. **(A-D)**. Full western blot images for blot seen in Figure 1. **(A)** and **(B)** show full blot with anti-PGP antibody p7965 from Sigma Aldrich. Annotations show protein size to the left and lanes are labeled with concentration of NNS treatment for HepG2. **(C)** and **(D)** show Total Protein Stain (Invitrogen) for full blot. **(E)** Conversion table shows concentrations of AceK and Sucr. Left column gives combined AceK + Sucr concentration as multiples of the Acceptable Daily Intake (xADI) for each sweetener (e.g., 1xADI equals 1xADI for AceK + 1xADI for Sucr. Columns to the right show equivalent concentrations given in  $\mu$ M concentrations, which are consistent with values given through the manuscript.

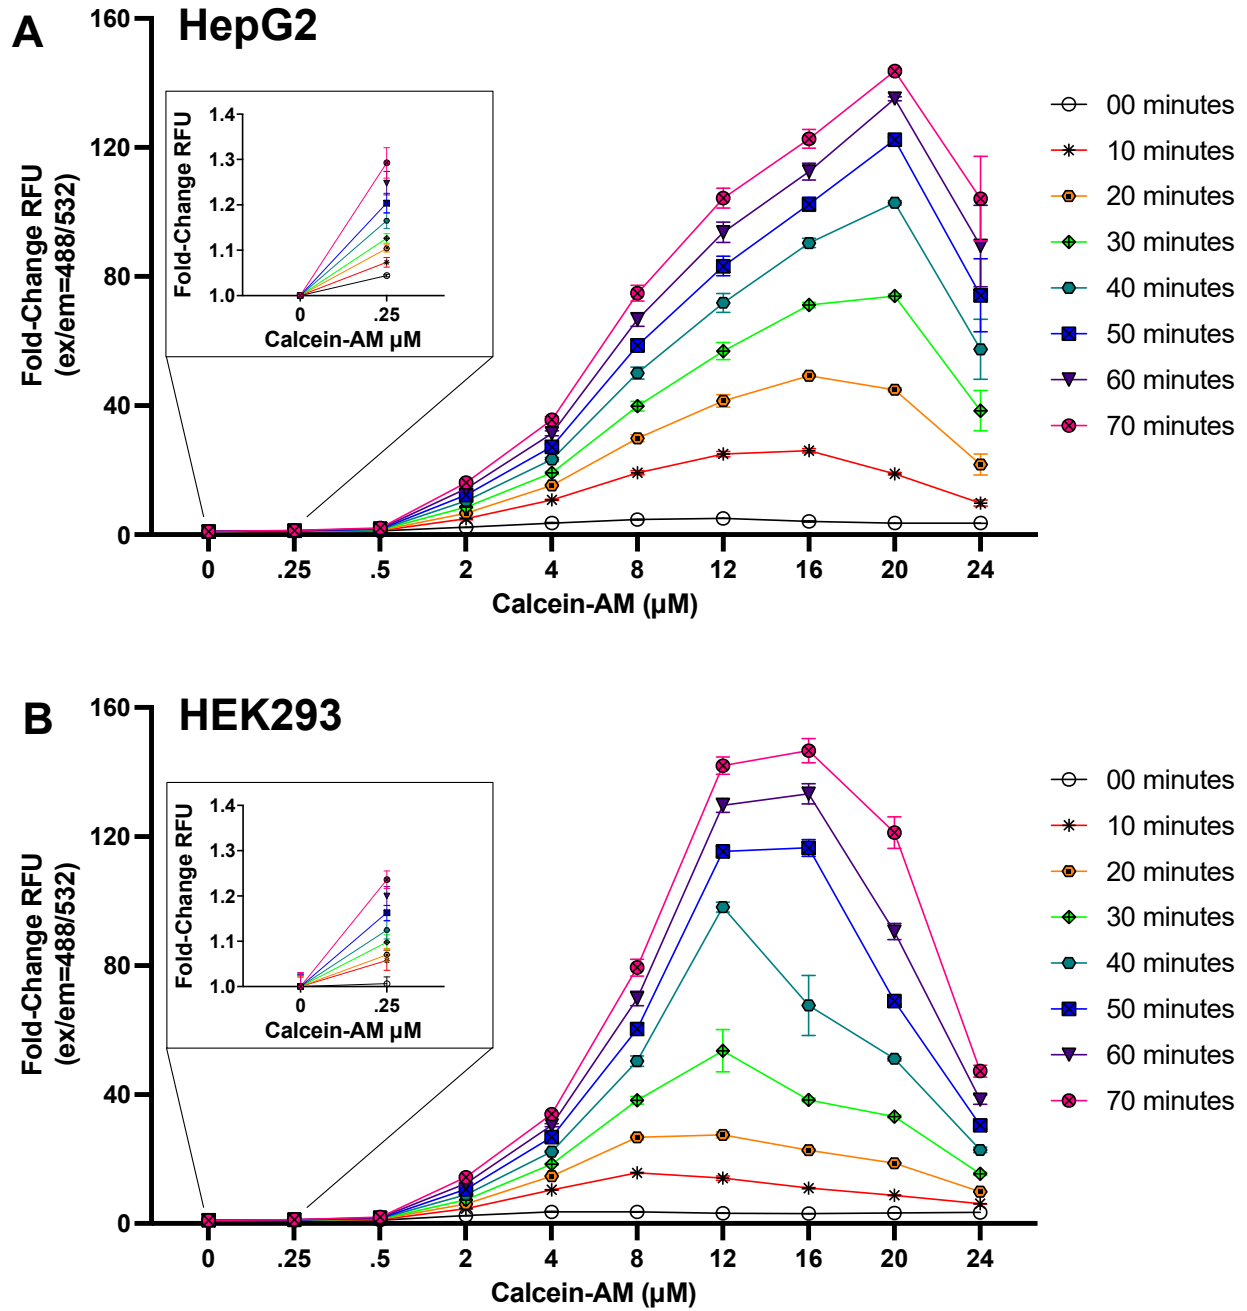

**Figure S2.** Calcein retention measured at different timepoints for varying Calcein-AM concentrations. (A/B) HepG2 (A) or HEK293 (B) were plated in clear 96-well plates and grown to 80-90% confluence. Cells were treated with varying concentrations of Calcein-AM and relative fluorescence was recorded every 10 minutes. Based on these results, conditions of 0.25  $\mu\text{M}$  Calcein-AM treatment and 30-minute incubation were selected for Calcein retention experiments conducted without commercial kit.

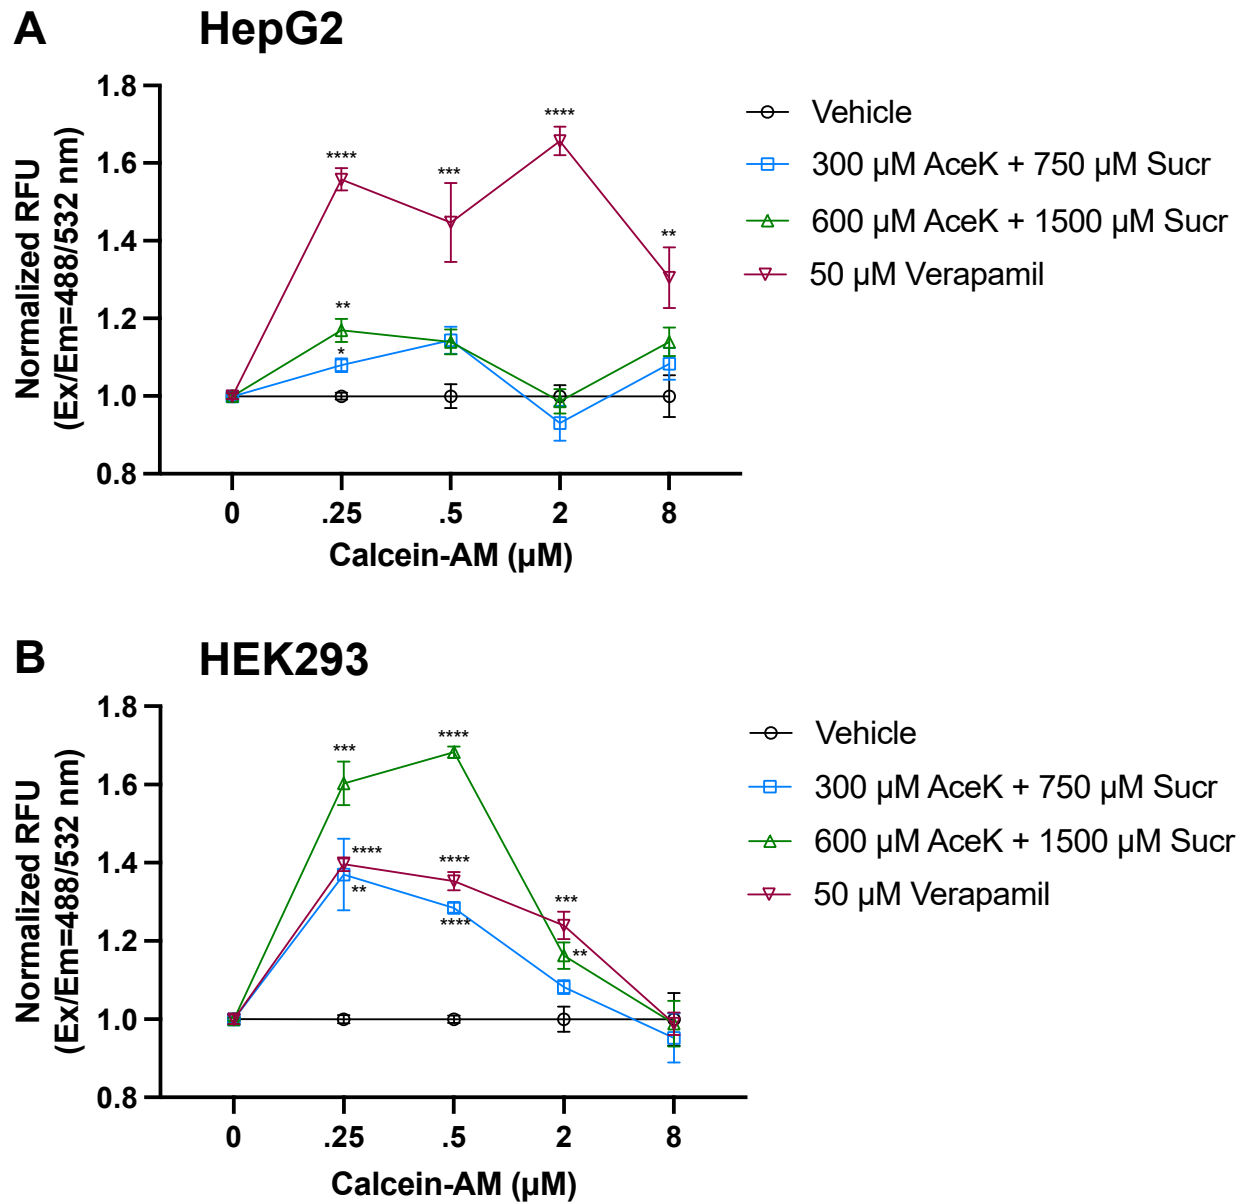

**Figure S3.** Sensitivity of human cell lines to Calcein-AM efflux inhibition. (A/B) HepG2 (A) or HEK293 (B) were plated in clear 96-well plates and grown to 80-90% confluence. Cells were treated with a combination of AceK + Sucr, Verapamil, or vehicle control, and then incubated with varying concentrations of Calcein-AM. Calcein-AM efflux inhibition was measured as fluorescence intensity of the fluorescent metabolite Calcein. Significance was measured as increased fluorescent signal based on treatment (NNS, Verapamil, vehicle) for each concentration of Calcein-AM.

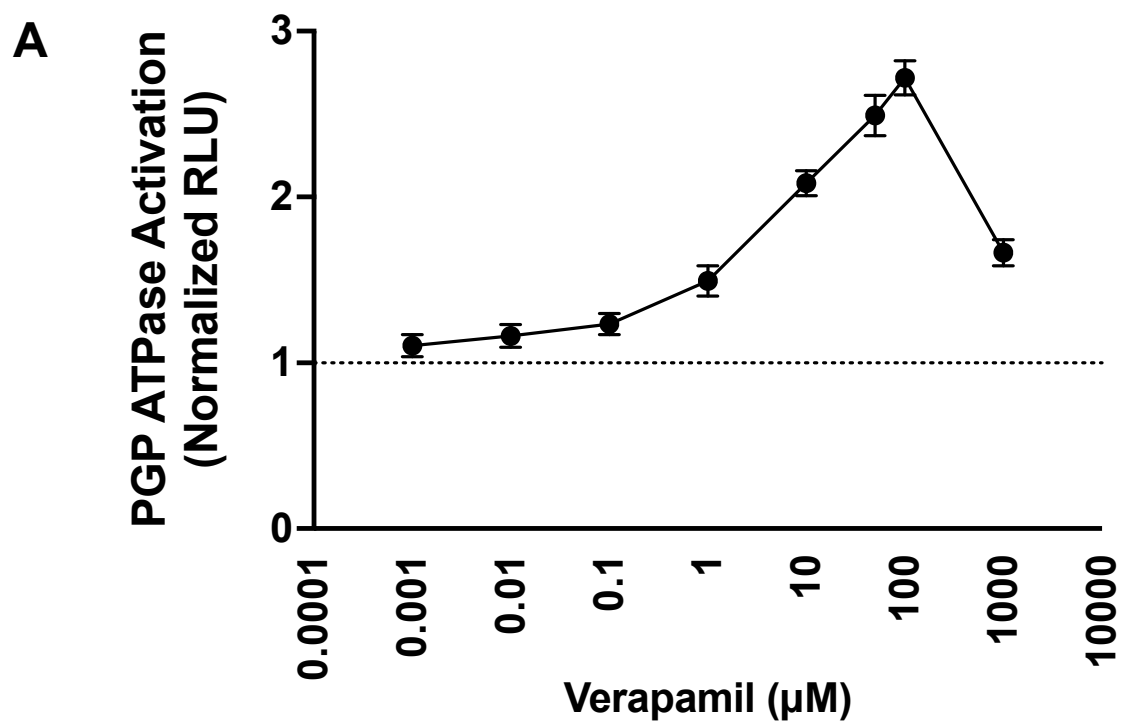

**Figure S4.** PGP ATPase stimulation by Verapamil. (A) PGP ATPase activity was monitored using the commercially available ADP-Glo Max Assay (Promega). Prior to treatment with AceK or Sucr test compounds, the assay system was validated using a range of concentrations of Verapamil, a known PGP substrate and competitive inhibitor. Peak ATPase activation at 50 and 100  $\mu\text{M}$  Verapamil were in agreement with the literature [37].

**Table S1.** Gene primers used in HepG2.

| <i>Gene Name</i>       | <i>Author</i>             | <i>Size (bp)</i> | <i>Forward Seq 5' - 3'</i> | <i>Reverse Seq 5' - 3'</i> | <i>F Primer Tm</i> | <i>R Primer Tm</i> |
|------------------------|---------------------------|------------------|----------------------------|----------------------------|--------------------|--------------------|
| <i>ADH4</i>            | Guo 2011                  | 134              | AGTTCGCATTTCAGATCATT-GCT   | CTGGCCCAATACTTTCCACAA      | 55                 | 55.4               |
| <i>ADH5</i>            | Guo 2011                  | 102              | TGCCAGAAGATAAGAG-TCACTCA   | GCTGGTTCCCATGTAATGCAA<br>A | 55.3               | 56.2               |
| <i>ADH6</i>            | Guo 2011                  | 83               | TGGTGCTGCAATCAATACTGC      | CAACAGACAAGCCGACTCCT       | 56.1               | 57.2               |
| <i>ALDH5A1</i>         | Guo 2011                  | 111              | AGTCATCACCCCGTGGAATTT      | GAGAAGGGCGTGTCTTCGG        | 56.6               | 58.1               |
| <i>ALDH7A1</i>         | Guo 2011                  | 204              | GATGATTGGAGGAC-CTATCTTGC   | ACAGCCACAC-TAATGAGGGAA     | 55.1               | 56.1               |
| <i>CEL</i>             | Guo 2011                  | 126              | GTCACCTTCAACTACCGTGTC      | GGCCGCGATATTCCTCTTCAC      | 55.3               | 58.1               |
| <i>CYP19A1</i>         | Lee 2007                  | 94               | AAGACGCAGGAT-TTCCACAGA     | TCTTGTCAAGGTCACCAC-GTTTC   | 56.5               | 57.2               |
| <i>CYP1A1</i>          | Lee 2007                  | 84               | GCTGCAACGGGTGGAATT         | CAGGCATGCTTCATGGTTAGC      | 56.4               | 56.7               |
| <i>CYP27A1</i>         | Guo 2011                  | 158              | CAGCACGACCTGACCTATGG       | TGGTCCAGTCGAG-TCATAAAGT    | 57.6               | 55.5               |
| <i>CYP27B1</i>         | Guo 2011                  | 138              | ACCAGATGTTTGCAATTT-GCTCA   | CAGGCAACTCTTCCCGGAAC       | 55.6               | 58.4               |
| <i>CYP39A1</i>         | Lee 2007                  | 83               | GGACCCATTACCCAAACAGA-GTT   | TTTGTTTATATTCAATTCGG-CATTG | 57.1               | 51                 |
| <i>ACSL4</i>           | Guo 2011                  | 122              | ACTGGCCGACCTAAGGGAG        | GCCAAAGGCAAGTAGCCAAT<br>A  | 58.9               | 55.7               |
| <i>EPHX1</i>           | Lee 2007                  | 76               | GGAGGCCTGGAAAGGAAGTT       | TGATGGTGCCTGTT-GTCCAGTA    | 57.2               | 58.4               |
| <i>SULT1C2</i>         | Guo 2011                  | 227              | TCCTTTATGTAGCTCGAAATGCC    | TGGGTCCCTCTTTATGTCCTC      | 55                 | 55.9               |
| <i>ABCB1</i>           | Lee 2007                  | 68               | GTCCCAGGAGCCCATCCT         | CCCGGCTGTTGTCTCCATA        | 59.4               | 56.9               |
| <i>ABCB6</i>           | Lee 2007                  | 81               | TTCAGAAGGGCCG-TATTGAGTT    | TGAAAGACACGTCCTG-CAGAGT    | 56.3               | 58.4               |
| <i>ABCB10</i>          | Lee 2007                  | 75               | CCCCAAGGGTTCAACACTGT       | AATCGCAATCCGCTGTTTCT       | 57.6               | 55.2               |
| <i>ALP (ALPL)</i>      | Olivier-Van Stichelen Lab | 159              | AACATCAGGGACATTGAC-GTG     | GTATCTCGGTTTGAA-GCTCTTCC   | 55.3               | 55.4               |
| <i>ALT (GPT)</i>       | Olivier-Van Stichelen Lab | 213              | CCAGGGTGTGAAGAA-GCCTTT     | CTGTAGGCCCCCAGACTGT        | 57.6               | 59                 |
| <i>AST (GOT1)</i>      | Olivier-Van Stichelen Lab | 90               | ATTTCTTAGCGCGTTGGTACA      | ACACAGCATTGTGATTCTCCC      | 54.7               | 55.4               |
| <i>CYP3A4</i>          | Abou-Donia 2008           | 252              | GTGGGGCTTTTATGATGGTCA      | ACATCTCCATACTGGG-CAATGA    | 55.2               | 56                 |
| <i>CYP2D6</i>          | Abou-Donia 2008           | 288              | CCCTAAGGGAACGACAC-TCATC    | ACCAGGAAAGCAAAGA-CACCA     | 57                 | 57                 |
| <i>Control Primers</i> |                           |                  |                            |                            |                    |                    |
| <i>ACTB</i>            | Olivier-Van Stichelen Lab | 88               | GCACTCTTCCAGCCTTCC         | TGTCCACGTCACACTTCATG       | 55.9               | 55.1               |

Primers for human genes relevant to liver detoxification and health and control reference gene. Primers correspond with mRNA products assayed in Figure 1.

**Table S2.** Log files from Autodock VINA (ADV) molecular docking experiments and manually assigned pocket designation.

| Vera-<br>pamil |        |                        |                              |                              | Acesul-<br>fame Po-<br>tassium |        |                        |                              |                              |
|----------------|--------|------------------------|------------------------------|------------------------------|--------------------------------|--------|------------------------|------------------------------|------------------------------|
|                | pocket | affinity<br>(kcal/mol) | dist<br>from<br>rmsd<br>l.b. | best<br>mode<br>rmsd<br>u.b. |                                | pocket | affinity<br>(kcal/mol) | dist<br>from<br>rmsd<br>l.b. | best<br>mode<br>rmsd<br>u.b. |
| 1              | 1      | -6.645                 | 0                            | 0                            | 1                              | 3      | -5.186                 | 0                            | 0                            |
| 2              | 1      | -6.54                  | 2.715                        | 5.352                        | 2                              | 2      | -4.955                 | 17.32                        | 18.15                        |
| 3              | 1      | -6.501                 | 2.03                         | 3.741                        | 3                              | 3      | -4.95                  | 2.516                        | 3.185                        |
| 4              | 1      | -6.431                 | 2.449                        | 4.456                        | 4                              | 2      | -4.945                 | 16.98                        | 17.93                        |
| 5              | 1      | -6.413                 | 0.8102                       | 1.804                        | 5                              | 3      | -4.878                 | 2.572                        | 3.659                        |
| 6              | 1      | -6.405                 | 1.956                        | 2.91                         | 6                              | 2      | -4.796                 | 17.32                        | 18.1                         |
| 7              | 1      | -6.38                  | 0.9522                       | 2.432                        | 7                              | 2      | -4.74                  | 16.8                         | 17.71                        |
| 8              | 1      | -6.346                 | 2.285                        | 4.047                        | 8                              | 3      | -4.716                 | 2.589                        | 3.468                        |
| 9              | 1      | -6.321                 | 1.587                        | 2.33                         | 9                              | 3      | -4.618                 | 16.21                        | 17.13                        |
| 10             | 1      | -6.313                 | 2.5                          | 4.969                        | 10                             | out    | -4.613                 | 11.88                        | 12.6                         |
| 11             | 1      | -6.266                 | 1.575                        | 3.229                        | 11                             | 2      | -4.603                 | 8.608                        | 9.19                         |
| 12             | 1      | -6.247                 | 2.138                        | 3.634                        | 12                             | 3      | -4.532                 | 17.12                        | 18.08                        |
| 13             | 1      | -6.209                 | 3.025                        | 7.351                        | 13                             | 3      | -4.507                 | 17.21                        | 18.02                        |
| 14             | 1      | -6.183                 | 2.842                        | 4.833                        | 14                             | 2      | -4.503                 | 14.59                        | 16                           |
| 15             | 1      | -6.161                 | 2.568                        | 4.636                        | 15                             | 2      | -4.5                   | 6.524                        | 7.379                        |
| 16             | 1      | -6.142                 | 2.884                        | 5.315                        | 16                             | 3      | -4.493                 | 7.558                        | 8.035                        |
| 17             | 1      | -6.109                 | 2.582                        | 4.516                        | 17                             | 1      | -4.483                 | 7.686                        | 8.661                        |
| 18             | 1      | -5.996                 | 2.908                        | 6.614                        | 18                             | 1      | -4.459                 | 6.667                        | 7.513                        |
| 19             | 1      | -5.996                 | 1.411                        | 2.405                        | 19                             | 1      | -4.39                  | 6.899                        | 7.731                        |
| 20             | 1      | -5.947                 | 2.06                         | 4.29                         | 20                             | out    | -4.388                 | 6.122                        | 6.764                        |
| Su-<br>cralose |        |                        |                              |                              | Sucrose                        |        |                        |                              |                              |
|                | pocket | affinity<br>(kcal/mol) | dist<br>from<br>rmsd<br>l.b. | best<br>mode<br>rmsd<br>u.b. |                                | pocket | affinity<br>(kcal/mol) | dist<br>from<br>rmsd<br>l.b. | best<br>mode<br>rmsd<br>u.b. |
| 1              | 2      | -6.575                 | 0                            | 0                            | 1                              | 2      | -5.723                 | 0                            | 0                            |
| 2              | 1      | -6.194                 | 9.119                        | 12.85                        | 2                              | 2      | -5.626                 | 1.697                        | 4.643                        |
| 3              | 1      | -5.903                 | 10.99                        | 13.46                        | 3                              | 1      | -5.534                 | 12.46                        | 15.15                        |
| 4              | 1      | -5.845                 | 8.054                        | 11.68                        | 4                              | 2      | -5.528                 | 1.526                        | 3.76                         |
| 5              | 1      | -5.741                 | 13.45                        | 15.95                        | 5                              | 1      | -5.482                 | 12.4                         | 15                           |
| 6              | 1      | -5.632                 | 8.745                        | 11.8                         | 6                              | 2      | -5.413                 | 1.702                        | 4.12                         |
| 7              | 3      | -5.615                 | 16.57                        | 19.16                        | 7                              | 1      | -5.298                 | 9.749                        | 12.35                        |
| 8              | 3      | -5.593                 | 14.3                         | 17.15                        | 8                              | 2      | -5.298                 | 1.642                        | 4.139                        |
| 9              | 1      | -5.585                 | 11.79                        | 14.46                        | 9                              | 3      | -5.292                 | 17.1                         | 19.95                        |
| 10             | 1      | -5.559                 | 11.02                        | 13.76                        | 10                             | 3      | -5.278                 | 16.99                        | 19.28                        |
| 11             | 1      | -5.516                 | 11.45                        | 15.09                        | 11                             | 1      | -5.228                 | 11.67                        | 14.25                        |
| 12             | 1      | -5.514                 | 14.16                        | 16.77                        | 12                             | 1      | -5.185                 | 13.47                        | 15.45                        |
| 13             | 1      | -5.489                 | 14.49                        | 16.65                        | 13                             | 3      | -5.102                 | 15.44                        | 17.99                        |
| 14             | 3      | -5.472                 | 14.47                        | 17.34                        | 14                             | 3      | -5.048                 | 16.01                        | 18.68                        |
| 15             | 1      | -5.47                  | 7.957                        | 10.74                        | 15                             | 2      | -5.036                 | 2.015                        | 3.753                        |
| 16             | 1      | -5.464                 | 13.48                        | 16.54                        | 16                             | 3      | -5.016                 | 16.01                        | 18.34                        |

|    |   |        |       |       |    |   |        |       |       |
|----|---|--------|-------|-------|----|---|--------|-------|-------|
| 17 | 1 | -5.434 | 11.01 | 14.01 | 17 | 3 | -5.011 | 17    | 19.69 |
| 18 | 1 | -5.428 | 13.44 | 17.18 | 18 | 1 | -4.939 | 12.73 | 15.67 |
| 19 | 1 | -5.363 | 12.73 | 14.91 | 19 | 3 | -4.912 | 15.42 | 17.73 |
| 20 | 1 | -5.275 | 12.32 | 15.26 | 20 | 1 | -4.871 | 13.97 | 16.58 |

Docking positions are given on the far left column for each docked compound. Pocket assignments were given following visual inspection of docking pose within transmembrane cavity on PyMOL. Affinity (kcal/mol), dist from rmsd l.b., and best mode rmsd u.b. calculated automatically by ADV.
